# Supplementary material for: Ideal two-dimensional solid electrolytes for fast ion transport: metal trihalides MX3 with intrinsic atomic pores
Source: Royal Society of Chemistry journal article supplement (doi:10.1039/c9nr08719b), 2020-01-01
Supplement: c9nr08719b1.pdf [file c9nr08719b1.pdf]

## Supplementary Information

### **Ideal two-dimensional solid electrolytes for fast ions transport: metal trihalides $\text{MX}_3$ with intrinsic atomic pores**

*Maokun Wu,<sup>a</sup> Pan Liu,<sup>a</sup> Luyan Li,<sup>b</sup> Hong Dong,<sup>a</sup> Yahui Cheng,<sup>a</sup> Haijun Chen,<sup>a</sup>*

*Weichao Wang,<sup>a</sup> Hui Liu,<sup>a</sup> FengLu,<sup>a,\*</sup> Wei-Hua Wang,<sup>a,\*</sup> Kyeongjae Cho<sup>c,\*</sup>*

<sup>a</sup>Department of Electronic Science and Engineering, and Key Laboratory of Photo-Electronic Thin Film Device and Technology of Tianjin, Nankai University, Tianjin 300350, P. R. China

<sup>b</sup>School of Science, Shandong Jianzhu University, Jinan 250101, China

<sup>c</sup>Department of Materials Science and Engineering, The University of Texas at Dallas, Richardson, TX 75080, USA

Email addresses: [whwangnk@nankai.edu.cn](mailto:whwangnk@nankai.edu.cn); [lufeng@nankai.edu.cn](mailto:lufeng@nankai.edu.cn); [kjcho@utdallas.edu](mailto:kjcho@utdallas.edu)

## S1. The optimized structural parameters of monolayer MX<sub>3</sub>-ion systems

**Table S1** The optimized structural parameters of monolayer MX<sub>3</sub>-ion systems. The pore size of monolayer MX<sub>3</sub> ( $r$  in Å) and the vertical distance from the metal ion to the M atoms plane ( $d$  in Å).  $d=0.0$  Å represents that the ion is located within the M atoms plane.

|                                   | ScCl <sub>3</sub> |         | ScBr <sub>3</sub> |         | AsI <sub>3</sub> |         | ScI <sub>3</sub> |         |
|-----------------------------------|-------------------|---------|-------------------|---------|------------------|---------|------------------|---------|
|                                   | $r$ (Å)           | $d$ (Å) | $r$ (Å)           | $d$ (Å) | $r$ (Å)          | $d$ (Å) | $r$ (Å)          | $d$ (Å) |
| Pristine MX <sub>3</sub>          | 4.72              | /       | 4.91              | /       | 5.18             | /       | 5.26             | /       |
| MX <sub>3</sub> -Li <sup>+</sup>  | 4.46              | 0.00    | 4.69              | 0.00    | 5.05             | 0.00    | 5.09             | 0.00    |
| MX <sub>3</sub> -Na <sup>+</sup>  | 4.71              | 2.81    | 4.97              | 2.90    | 5.28             | 0.00    | 5.40             | 2.64    |
| MX <sub>3</sub> -K <sup>+</sup>   | 4.72              | 3.59    | 4.93              | 3.77    | 5.30             | 3.96    | 5.32             | 3.98    |
| MX <sub>3</sub> -Mg <sup>2+</sup> | 4.28              | 0.00    | 4.52              | 0.00    | 4.89             | 0.00    | 4.95             | 0.00    |
| MX <sub>3</sub> -Ca <sup>2+</sup> | 4.66              | 2.82    | 4.96              | 2.78    | 5.22             | 0.00    | 5.26             | 0.00    |

  

|                                   | YBr <sub>3</sub> |         | SbI <sub>3</sub> |         | YI <sub>3</sub> |         | BiI <sub>3</sub> |         |
|-----------------------------------|------------------|---------|------------------|---------|-----------------|---------|------------------|---------|
|                                   | $r$ (Å)          | $d$ (Å) | $r$ (Å)          | $d$ (Å) | $r$ (Å)         | $d$ (Å) | $r$ (Å)          | $d$ (Å) |
| Pristine MX <sub>3</sub>          | 5.29             | /       | 5.42             | /       | 5.51            | /       | 5.53             | /       |
| MX <sub>3</sub> -Li <sup>+</sup>  | 4.90             | 0.00    | 5.11             | 0.00    | 5.20            | 0.00    | 5.18             | 0.00    |
| MX <sub>3</sub> -Na <sup>+</sup>  | 5.34             | 0.00    | 5.39             | 0.00    | 5.45            | 0.00    | 5.44             | 0.00    |
| MX <sub>3</sub> -K <sup>+</sup>   | 5.31             | 3.61    | 5.61             | 3.80    | 5.55            | 3.87    | 5.70             | 3.76    |
| MX <sub>3</sub> -Mg <sup>2+</sup> | 4.61             | 0.00    | 4.87             | 0.00    | 4.96            | 0.00    | 4.90             | 0.00    |
| MX <sub>3</sub> -Ca <sup>2+</sup> | 5.03             | 0.00    | 5.24             | 0.00    | 5.30            | 0.00    | 5.25             | 0.00    |

## S2. Diffusion time of ions travelling through monolayer MX<sub>3</sub>

**Table S2** Diffusion time  $\tau$ (ion) (s) of metal ions through monolayer MX<sub>3</sub>.

|                            | ScCl <sub>3</sub>      | ScBr <sub>3</sub>     | AsI <sub>3</sub>      | ScI <sub>3</sub>      | YBr <sub>3</sub>       | SbI <sub>3</sub>       | YI <sub>3</sub>        | BiI <sub>3</sub>      |
|----------------------------|------------------------|-----------------------|-----------------------|-----------------------|------------------------|------------------------|------------------------|-----------------------|
| $\tau$ (Li <sup>+</sup> )  | $4.67 \times 10^{-5}$  | $1.98 \times 10^{-3}$ | $7.58 \times 10^{-5}$ | $3.69 \times 10^{-4}$ | $5.92 \times 10^{-6}$  | $5.05 \times 10^{-6}$  | $3.92 \times 10^{-5}$  | $8.06 \times 10^{-6}$ |
| $\tau$ (Na <sup>+</sup> )  | $4.85 \times 10^{-11}$ | $7.96 \times 10^{-9}$ | $1.88 \times 10^{-5}$ | $4.42 \times 10^{-7}$ | $2.62 \times 10^{-6}$  | $8.20 \times 10^{-5}$  | $9.90 \times 10^{-5}$  | $1.46 \times 10^{-4}$ |
| $\tau$ (K <sup>+</sup> )   | $1.28 \times 10^2$     | $1.16 \times 10^{-4}$ | $1.40 \times 10^{-9}$ | $3.73 \times 10^{-8}$ | $3.09 \times 10^{-10}$ | $9.52 \times 10^{-10}$ | $3.48 \times 10^{-10}$ | $3.40 \times 10^{-9}$ |
| $\tau$ (Mg <sup>2+</sup> ) | $5.62 \times 10^{10}$  | $1.02 \times 10^{12}$ | $2.67 \times 10^0$    | $1.04 \times 10^{11}$ | $1.17 \times 10^{11}$  | $9.62 \times 10^0$     | $2.14 \times 10^{10}$  | $1.67 \times 10^4$    |
| $\tau$ (Ca <sup>2+</sup> ) | $1.07 \times 10^{-3}$  | $5.59 \times 10^{-2}$ | $1.60 \times 10^4$    | $2.19 \times 10^9$    | $5.99 \times 10^7$     | $8.93 \times 10^5$     | $9.62 \times 10^{10}$  | $9.01 \times 10^8$    |

### S3. Phonon spectra of $\text{MX}_3\text{-Li}^+$ complexes

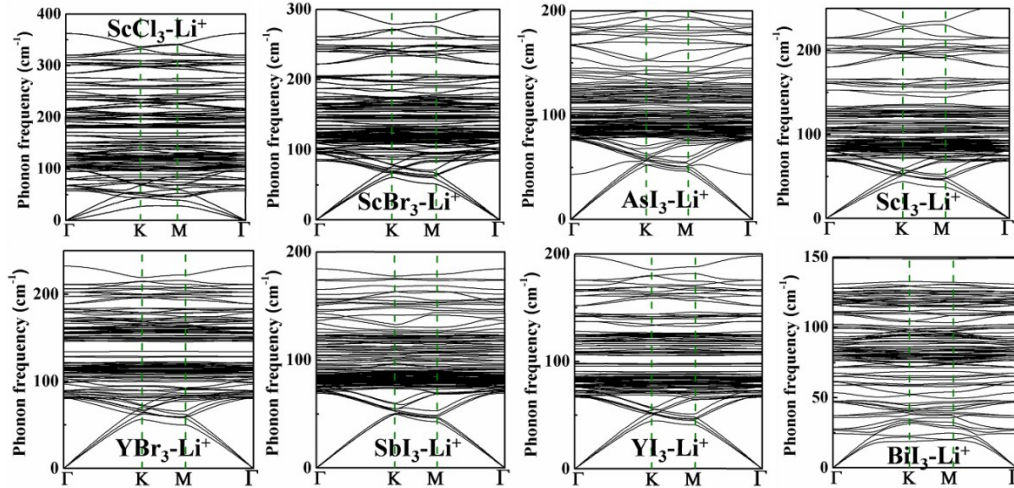

Fig. S1 (Color online) Phonon dispersions for  $\text{MX}_3\text{-Li}^+$  systems along high symmetric directions.

### S4. Band structures of pristine $\text{ScCl}_3$ and $\text{ScCl}_3\text{-Li}^+$ complex

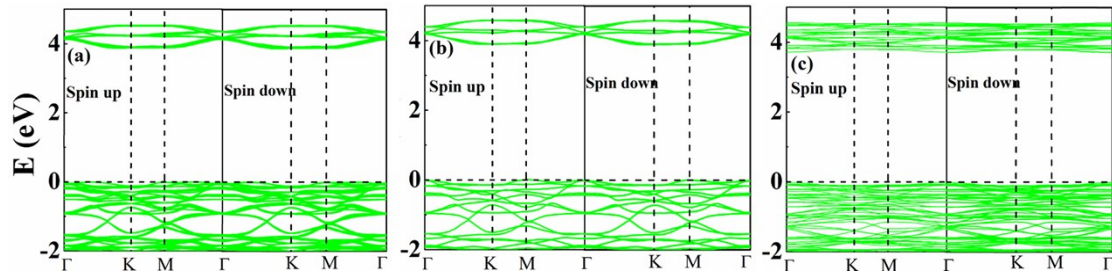

Fig. S2 (Color online) Band structures of spin-up and spin-down channels for (a) bulk  $\text{ScCl}_3$ , (b) monolayer  $\text{ScCl}_3$ , and (c) monolayer  $\text{ScCl}_3\text{-Li}^+$  systems. The Fermi level marked by the horizontal dashed lines is set as a value of zero.

The non-magnetic state for all pristine  $\text{MX}_3$  and  $\text{MX}_3\text{-ion}$  complexes has been converged through initial setting up spin-polarized state. The band structures of bulk  $\text{ScCl}_3$ , monolayer  $\text{ScCl}_3$  and  $\text{ScCl}_3\text{-Li}^+$  complex as examples are displayed in Fig. S2, where the spin up and spin down channels are symmetric. It is also consistent with the literature reports on bulk  $\text{ScCl}_3$ .<sup>1</sup> In addition, the non-magnetic states and insulating character of  $\text{MX}_3$  are kept intact during the ions transport because empty or fully occupation of M-3d (4d) orbitals is almost unchanged.

### S5. Electronic states of ions travelling through monolayer $\text{MX}_3$ with HSE06 functional

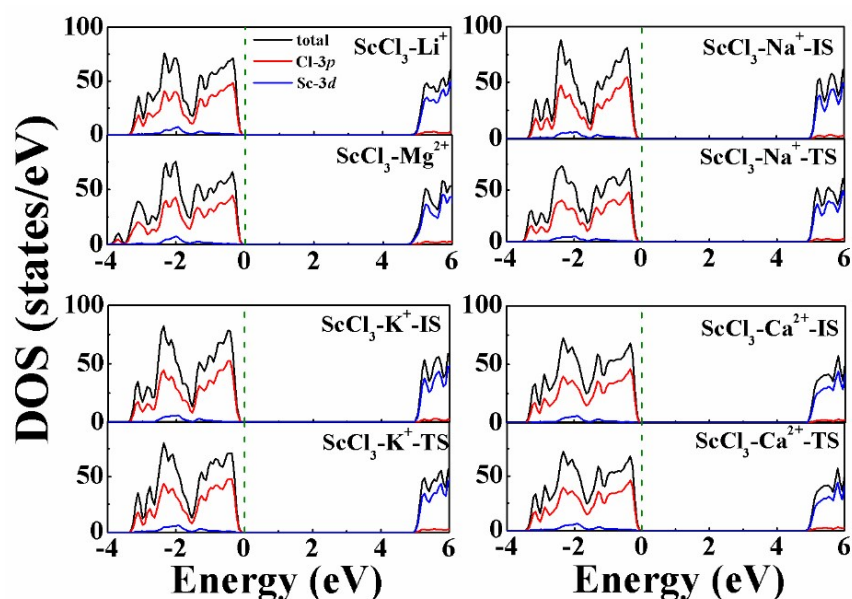

**Fig. S3** (Color online) Density of states (DOS) and partial DOS (PDOS) of  $\text{ScCl}_3$ -ion complexes under the initial state (IS) and transition state (TS) with HSE06 method. (a)  $\text{ScCl}_3$ - $\text{Li}^+/\text{Mg}^{2+}$ -TS, (b)  $\text{ScCl}_3$ - $\text{Na}^+$ , (c)  $\text{ScCl}_3$ - $\text{K}^+$ , (d)  $\text{ScCl}_3$ - $\text{Ca}^{2+}$ . The Fermi level is set to be 0 eV.

### S6. Band structures of $\text{MX}_3$ -ion systems with PBE and PBE+SOC methods

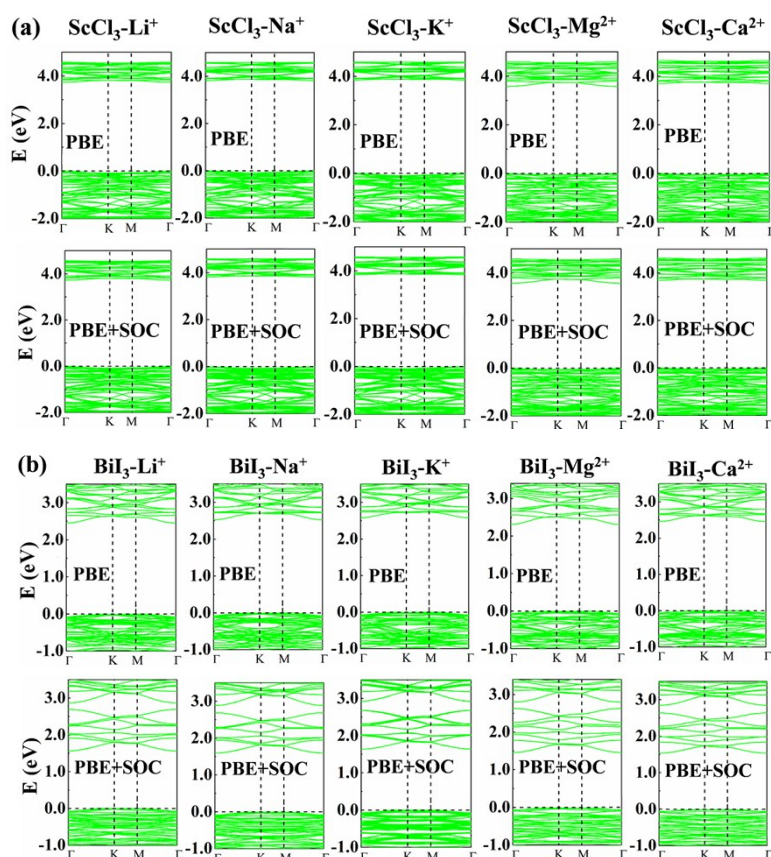

**Fig. S4** (Color online) The band structures of (a)  $\text{ScCl}_3$ -ion and (b)  $\text{BiI}_3$ -ion systems with PBE and PBE+SOC methods. The Fermi level marked by the horizontal dashed lines is set as 0.

### S7. The relative energy curves of ions diffusion in multilayered ScCl<sub>3</sub>

About the ion diffusion in multilayered ScCl<sub>3</sub> in Fig. S5, the diffusion pathway is divided into the step 1 of intralayer diffusion and step 2 of interlayer diffusion. For step 1 transport, the ion in initial state is not trapped within the Sc atoms plane due to the interaction between adjacent layers. For Li<sup>+</sup> and Mg<sup>2+</sup> with smaller ionic radius,  $E_a$  of Li<sup>+</sup> and Mg<sup>2+</sup> transporting through multilayered ScCl<sub>3</sub> are reduced to  $\sim 0.12$  eV and  $\sim 0.55$  eV in step 1 relative to the monolayer transport. In contrast, Na<sup>+</sup> and Ca<sup>2+</sup> show enhanced  $E_a$  of  $\sim 0.36$  eV and 0.81 eV through multilayered ScCl<sub>3</sub>. In addition, it is still difficult for K<sup>+</sup> to pass through ScCl<sub>3</sub> with  $E_a$  of  $\sim 0.91$  eV. For step 2 transport, the energy barrier curves behave like volcanos, and the  $E_a$  increases with the ion mass.

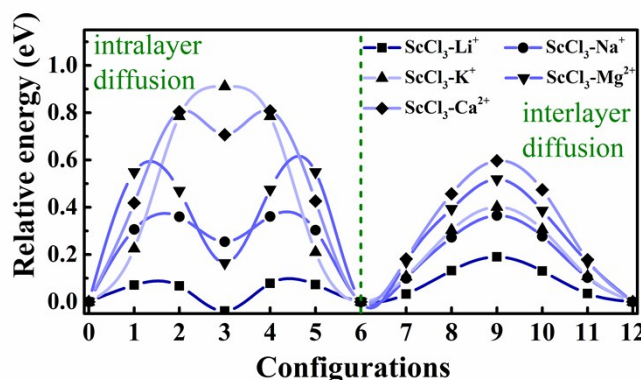

**Fig. S5** (Color online) The relative energy curves of ions diffusion in multilayered ScCl<sub>3</sub>. Left side and right side correspond to the step 1 of intralayer diffusion and the step 2 of interlayer diffusion.

### S8. Diffusion time of ions transport through one layer of multilayered MX<sub>3</sub>

**Table S3** Diffusion time  $\tau(\text{ion})$  (in s) of metal ions travelling through one layer of multilayered MX<sub>3</sub>.

|                        | ScCl <sub>3</sub>      | ScBr <sub>3</sub>     | AsI <sub>3</sub>      | ScI <sub>3</sub>      | YBr <sub>3</sub>       | SbI <sub>3</sub>       | YI <sub>3</sub>        | BiI <sub>3</sub>      |
|------------------------|------------------------|-----------------------|-----------------------|-----------------------|------------------------|------------------------|------------------------|-----------------------|
| $\tau(\text{Li}^+)$    | $1.61 \times 10^{-10}$ | $1.34 \times 10^{-9}$ | $2.27 \times 10^{-8}$ | $1.37 \times 10^{-8}$ | $2.98 \times 10^{-11}$ | $9.08 \times 10^{-11}$ | $5.09 \times 10^{-10}$ | $1.36 \times 10^{-9}$ |
| $\tau(\text{Na}^+)$    | $2.44 \times 10^{-7}$  | $5.81 \times 10^{-7}$ | $8.06 \times 10^{-6}$ | $4.02 \times 10^{-6}$ | $3.07 \times 10^{-8}$  | $4.03 \times 10^{-8}$  | $1.10 \times 10^{-7}$  | $2.48 \times 10^{-7}$ |
| $\tau(\text{K}^+)$     | $1.87 \times 10^2$     | $2.82 \times 10^{-4}$ | $3.36 \times 10^{-5}$ | $2.99 \times 10^{-5}$ | $9.38 \times 10^{-7}$  | $6.78 \times 10^{-8}$  | $8.20 \times 10^{-7}$  | $2.53 \times 10^{-6}$ |
| $\tau(\text{Mg}^{2+})$ | $2.13 \times 10^{-4}$  | $2.82 \times 10^{-4}$ | $1.95 \times 10^{-3}$ | $1.02 \times 10^{-2}$ | $3.32 \times 10^{-7}$  | $2.11 \times 10^{-6}$  | $7.19 \times 10^{-6}$  | $2.94 \times 10^{-6}$ |
| $\tau(\text{Ca}^{2+})$ | $3.65 \times 10^0$     | $4.27 \times 10^{-2}$ | $0.43 \times 10^0$    | $0.54 \times 10^0$    | $5.94 \times 10^{-4}$  | $9.76 \times 10^{-5}$  | $1.14 \times 10^{-2}$  | $3.57 \times 10^{-3}$ |

## S9. Electronic structures of multilayered $\text{MX}_3$ -ion complexes during ions diffusion process

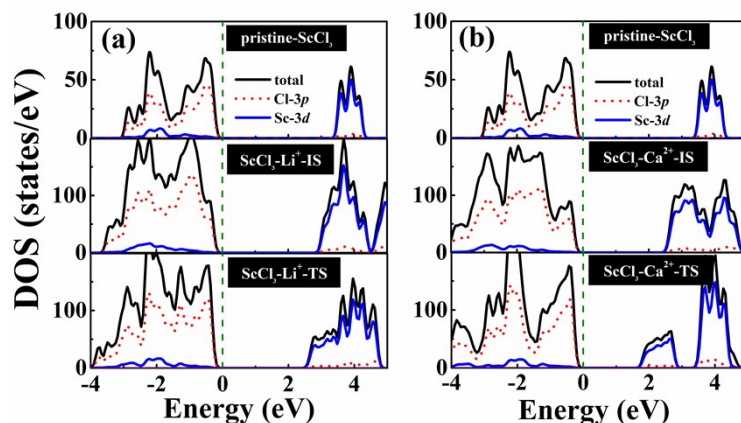

**Fig. S6** (Color online) Density of states (DOS) of pristine  $\text{ScCl}_3$  and  $\text{Li}^+/\text{Ca}^{2+}$  diffusion in bulk  $\text{ScCl}_3$  in initial state (IS) and transition state (TS) with PBE functional. (a)  $\text{ScCl}_3\text{-Li}^+$  (b)  $\text{ScCl}_3\text{-Ca}^{2+}$ . The Fermi level is set to be 0 eV.

The insulating character of multilayered  $\text{MX}_3$  is well reserved during the ions diffusion process as shown in Fig. S6. In order to look into the influence of the ions diffusion on the band edges positions, the local density of states (LDOS) of multilayered  $\text{ScCl}_3\text{-Li}^+/\text{Ca}^{2+}$  systems at the initial state (IS) and final state (FS) during the intralayer diffusion step are displayed in Fig. S7. In fact,  $\text{Li}^+/\text{Ca}^{2+}$  is located within  $\text{ScCl}_3$  layer-3<sup>rd</sup> and layer-1<sup>st</sup> in the IS considering the periodic boundary conditions. It is found that the band edges of  $\text{ScCl}_3$  layer-3<sup>rd</sup> and layer-1<sup>st</sup> shift down and those of layer-2<sup>nd</sup> are retained, which is demonstrated in Fig. S7(b) and Fig. S7(c). In the TS, the  $\text{Li}^+/\text{Ca}^{2+}$  is within the pore in  $\text{ScCl}_3$  layer-3<sup>rd</sup>. The band edges of the layer-3<sup>rd</sup> shift down and those of the other two layers are intact in Fig. S7(e) and Fig. S7(f). The band edges shift is due to the attraction interaction between the  $\text{Li}^+/\text{Ca}^{2+}$  and the electrons from the nearest  $\text{ScCl}_3$  layer. Nevertheless, it is noted that no carriers transfer among  $\text{ScCl}_3$  layers occurs and the insulating behavior is not affected by the ions travelling.

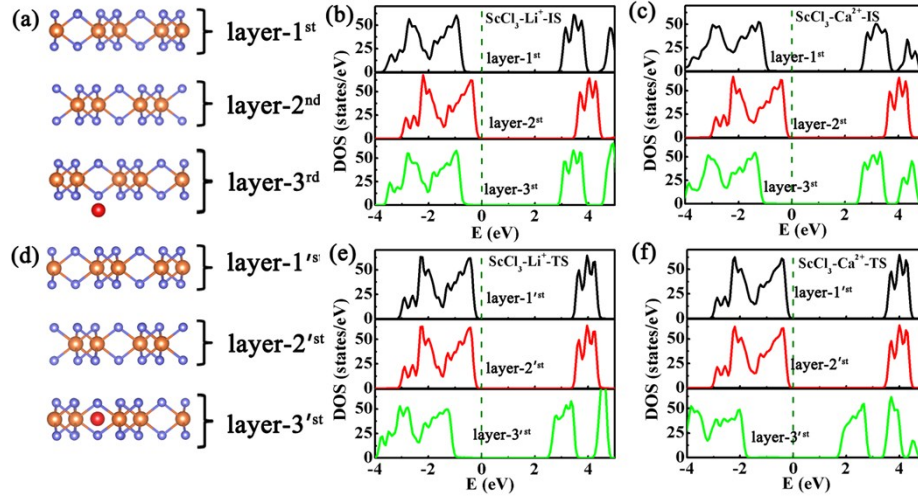

**Fig. S7** (Color online) The schematic structure of IS in (a) and that of TS in (d) for intralayer diffusion of  $\text{Li}^+$ ,  $\text{Ca}^{2+}$  through multilayered  $\text{ScCl}_3$ . The local density of states (LDOS) projected at different layers for  $\text{ScCl}_3\text{-Li}^+\text{-IS}$  in (b),  $\text{ScCl}_3\text{-Ca}^{2+}\text{-IS}$  in (c),  $\text{ScCl}_3\text{-Li}^+\text{-TS}$  in (e), and  $\text{ScCl}_3\text{-Ca}^{2+}\text{-TS}$  in (f). The Fermi level is set as 0 eV.

### S10. $\text{Li}^+$ ions transport affected by ions density

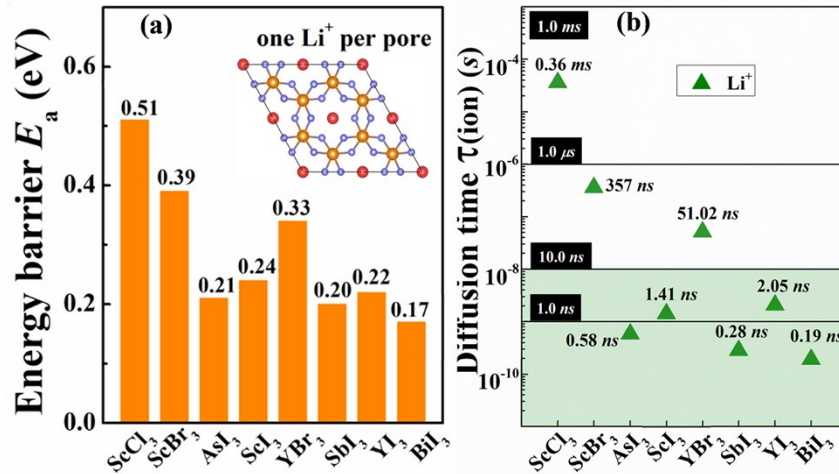

**Fig. S8** (Color online) The energy barriers ( $E_a$  in eV) in (a) and diffusion time  $\tau(\text{ion})$  (s) in (b) of  $\text{Li}^+$  transporting through one layer of  $\text{MX}_3$  when the ions density increases. The inset shows the top view of schematic structures. The red balls represent  $\text{Li}^+$  ions.

Since the ions transport through 2D  $\text{MX}_3$  might be affected by the increased ions density, here the  $\text{Li}^+$  transport performance through few layers  $\text{MX}_3$  has been examined when the ions density increases, e.g. one  $\text{Li}^+$  per atomic pore. As shown in Fig. S8, within one layer of  $\text{ScCl}_3$  and  $\text{ScBr}_3$  possessing small pore size, the diffusion energy barrier ( $E_a$ ) of  $\text{Li}^+$  actually increases with the increase of  $\text{Li}^+$  density. The present increased  $E_a$ , 0.51 eV and 0.39 eV in

Fig. S8(a), corresponds to the diffusing time of 0.36 *ms* and 357 *ns*. In contrast,  $E_a$  is still small in the range of 0.17 eV-0.33 eV for  $\text{Li}^+$  transporting through one layer of  $\text{AsI}_3$ ,  $\text{ScI}_3$ ,  $\text{YBr}_3$ ,  $\text{SbI}_3$ ,  $\text{YI}_3$  and  $\text{BiI}_3$  with large pore size. Consequently, the fast transport time through one layer of  $\text{MX}_3$  (0.58 *ns*, 1.41 *ns*, 51.02 *ns*, 0.28 *ns*, 2.05 *ns* and 0.19 *ns*) is well preserved in these systems.

### S11. Stability of $\text{Li}_x\text{MX}_3$ with the increase of $\text{Li}^+$ ions density

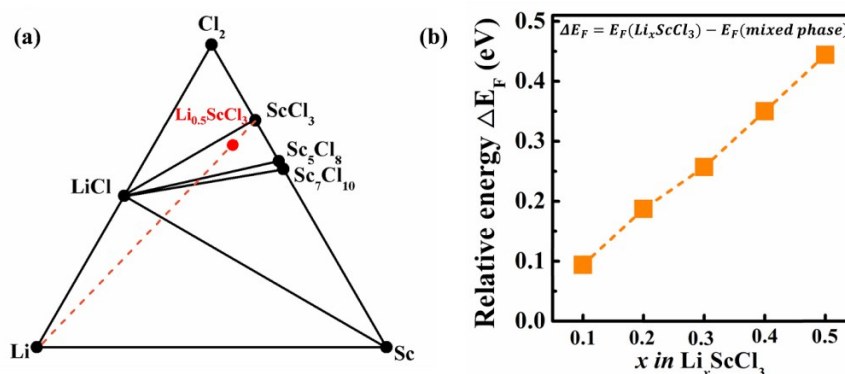

**Fig. S9** (Color online) (a) Compositional phase diagram of Li-Sc-Cl. The black dots represent the stable phases. The red dot denotes  $\text{Li}_{0.5}\text{ScCl}_3$ . The dashed line indicates the  $\text{ScCl}_3$ -Li compositional space. (b) Formation energy difference between  $\text{Li}_x\text{ScCl}_3$  and the mixed phase with the increase of the ions density.

The chemical formula of 2D solid electrolytes in this work could be treated as  $\text{Li}_x\text{MX}_3$  after the external  $\text{Li}^+$  ions are introduced. In the following, the stability of  $\text{Li}_x\text{MX}_3$  dependent on ions density is considered. Here Li-Sc-Cl is taken as an example and its phase stability is studied by constructing compositional phase diagram in Fig. S9(a).<sup>1,2</sup> At  $x=0$ , the pristine  $\text{ScCl}_3$  is thermodynamically stable. The high ions density phase under one  $\text{Li}^+$  per pore in one layer, corresponding to the chemical formula  $\text{Li}_{0.5}\text{ScCl}_3$ , is located within the triangle connected by LiCl,  $\text{ScCl}_3$  and  $\text{Sc}_5\text{Cl}_8$ . It implies that  $\text{Li}_{0.5}\text{ScCl}_3$  possibly decomposes into mixed phase including LiCl,  $\text{ScCl}_3$  and  $\text{Sc}_5\text{Cl}_8$ . Nonetheless, the formation energy difference between  $\text{Li}_x\text{ScCl}_3$  and the mixed phase,  $\Delta E_F = E_F(\text{Li}_x\text{ScCl}_3) - E_F(\text{mixed phase})$ , is small in the range of  $\sim 0.10$  eV-0.45 eV in Fig. S9(b). However, the decomposition reaction is not only determined by the thermodynamical stability, but also by the kinetics of chemical reactions. For  $\text{Li}_{0.5}\text{ScCl}_3$ ,  $\text{ScCl}_3$  is the host and the  $\text{Li}^+$  ions are regarded as dopants. The prerequisite to decompose  $\text{Li}_x\text{ScCl}_3$  and generate LiCl is breaking the bond of Sc-Cl. Referring to bond



dissociation energy (BDE) data, it is as large as  $\sim 3.45$  eV for Sc-Cl.<sup>3</sup> Besides, the large BDEs of Sc-Br ( $\sim 4.62$  eV), Y-Br ( $\sim 5.01$  eV), Y-I ( $\sim 4.40$  eV), and Bi-I ( $\sim 1.94$  eV) also demonstrate that it is hard to break M-X bond in these 2D  $\text{MX}_3$  solid electrolytes.<sup>3</sup> Combined with above discussions, it is not easy to form LiX or NaX in  $\text{Li}_x\text{MX}_3$  or  $\text{Na}_x\text{MX}_3$  due to large kinetic barriers involving bond breaking for the necessary reactions. Similarly, the chemical stability of  $\text{MX}_3$  contacting with Li metal electrode is characterized by decomposition reaction energy ( $\Delta E_D$ ) and kinetic reaction barrier. The  $\Delta E_D$  of  $\text{ScCl}_3$ ,  $\text{ScBr}_3$ ,  $\text{ScI}_3$ ,  $\text{YBr}_3$  and  $\text{YI}_3$  is in the range of  $-0.41$  eV to  $-0.68$  eV, which is much smaller than the currently used solid electrolytes, e.g., LGPS ( $-1.25$  eV) and  $\text{Li}_3\text{PS}_4$  ( $-1.42$  eV).<sup>4,5</sup> Considering the large kinetic barriers in the necessary reactions to break bonds of M-X,  $\text{ScCl}_3$ ,  $\text{ScBr}_3$ ,  $\text{ScI}_3$ ,  $\text{YBr}_3$  and  $\text{YI}_3$  as solid electrolytes contacting with Li metal would be stable.

## References

1. A. Jain, G. Hautier, C. J. Moore, S. P. Ong, C. C. Fischer, T. Mueller, K. A. Persson and G. Ceder, *Comput. Mater. Sci.*, 2011, 50, 2295-2310.
2. S. P. Ong, L. Wang, B. Kang and G. Ceder, *Chem. Mater.* 2008, 20, 1798-1807.
3. Y. R. Luo, *Comprehensive Handbook of Chemical Bond Energies*, CRC Press, 2007.
4. Y. Zhu, X. He and Y. Mo, *ACS Appl. Mater. Interfaces*, 2015, 7, 23685-23693.
5. Y. Zhu, X. He and Y. Mo, *J. Mater. Chem. A*, 2016, 4, 3253-3266.
